# Supplementary material for: Shared Decision-Making in Cardiovascular Risk Factor Management: A Systematic Review and Meta-Analysis
Source: PubMed Central journal article supplement (PMC10966415; doi:10.1001/jamanetworkopen.2024.3779), 2024-03-26
Supplement: jamanetwopen-e243779-s002.pdf [file jamanetwopen-e243779-s002.pdf]

## Data Sharing Statement

Elias. Shared Decision-Making in Cardiovascular Risk Factor Management. *JAMA Netw Open*.  
Published March 26, 2024. doi:10.1001/jamanetworkopen.2024.3779

### Data

**Data available:** No

### Additional Information

**Explanation for why data not available:** For purposes of reproducing the results, the data, analytical methods, and study materials are available from the corresponding author upon reasonable request.
